# Supplementary material for: A review on metallothionein research in marine and estuarine realms: past paradigms and future vistas
Source: Frontiers journal article supplement (doi:10.3389/fmars.2025.1636760), 2025-07-31
Supplement: Data_Sheet_1.pdf [file Data_Sheet_1.pdf]

**Table 1: Studies that evaluated MT protein or gene expression in response to heavy metal exposure in aquatic animals**

| Animal   | Species                                         | Study Aim                                                                                                                                                | MT induction          | Tissues                            | Heavy Metals           | Key Findings                                                                                                                                                                                                                                                                                  | Reference                 |
|----------|-------------------------------------------------|----------------------------------------------------------------------------------------------------------------------------------------------------------|-----------------------|------------------------------------|------------------------|-----------------------------------------------------------------------------------------------------------------------------------------------------------------------------------------------------------------------------------------------------------------------------------------------|---------------------------|
| Teleosts | <i>Dicentrarchus labrax, Solea senegalensis</i> | Cd organotropism, accumulation and MT induction                                                                                                          | MT protein expression | liver, muscle                      | Cd                     | MT concentrations failed to reflect Cd exposure in both species.                                                                                                                                                                                                                              | Croizier et al. 2018      |
|          | <i>Oncorhynchus kisutch</i>                     | Effect of cadmium on MT induction                                                                                                                        | qRT PCR               | liver, gill, and olfactory tissues | Cd                     | Peripheral olfactory system may be of greater utility for assessing short-term environmental exposures to cadmium                                                                                                                                                                             | Espinoza et al. 2012      |
|          | <i>Salmo salar</i>                              | Responses of biomarkers in Atlantic salmon ( <i>Salmo salar</i> ) following exposure to environmentally relevant concentrations of complex metal mixture | MT protein abundance  | Liver, kidneys                     | Zn, Cu, Ni, Cr, Pb, Cd | Liver and kidneys MT did not show statistically significant differences between the control and exposed group (MIX). However, hepatic MT level increased 1.34-fold after MIX treatment. Consequently, no further investigation of MT content after treatment with MIX variants was performed. | Stankevičiūtė et al. 2018 |
|          | <i>Salmo salar</i>                              | Combined $\gamma$ -irradiation and metal exposures in teleost                                                                                            | MT gene expression    | liver                              | Al + Cd                | No significant differences were seen between the metal exposure groups and control groups                                                                                                                                                                                                     | Olsvik et al. 2010        |

|                                |                                                                            |                                                                                    |                                              |                   |                                                                                                                                                   |                             |
|--------------------------------|----------------------------------------------------------------------------|------------------------------------------------------------------------------------|----------------------------------------------|-------------------|---------------------------------------------------------------------------------------------------------------------------------------------------|-----------------------------|
| <i>Naso hexacanthus</i>        | MT expression as a biomarker of toxicity of heavy metals                   | Semi-Quantitative Analysis of MT Gene Expression                                   | liver gills                                  | Cd, Cu, Zn and Pb | MT expression increased in response to metal exposure compared to control                                                                         | Montaser et al. 2010        |
| <i>Sparus aurata</i>           | MT content in tissues of fish from three different fish farming systems    | MT content is determined by estimation of cysteine residues by the Ellman reaction | caudal muscle, gut, liver, kidneys and gills | Cd, Pb            | No correlation is present between heavy metals and MT content in muscle tissue.                                                                   | Creti et al. 2010           |
| <i>Clarias gariepinus</i>      | MT expression from wild African populations of                             | qRT PCR                                                                            | liver                                        | Cu, Zn            | Significant correlations were found between Zn and Cu levels and MT expression in livers                                                          | M'kandawire et al. 2017     |
| <i>Nothobranchius rachovii</i> | MT response to short-term exposure to physiological and chemical stressors | Northern blot                                                                      | liver, gill, and intestine                   | Cd                | Increase in gill MT mRNA induction was observed in non-spawning killifish exposed to 6 ppb of waterborne CdCl <sub>2</sub> compared with controls | Van Cleef-Toedt et al. 2001 |
| <i>Oreochromis niloticus</i>   | Seasonal assessment of MT gene expression pollution                        | qRT PCR                                                                            | liver and muscle                             | Zn, Cu, Pb, Cd    | A positive correlation occurred between MT levels and Cu and Pb concentrations                                                                    | Girgis et al. 2019          |
| <i>Trematomus hansonii</i>     | Physiological response of fish against metal toxicity                      | Silver saturation and qRT PCR                                                      | gills and liver                              | Cu, Cd            | MT expression in liver was increased in response to Cd, whereas there was a                                                                       | Bakiu et al. 2022           |

|          |                                                              |                                                                                                                            |                                                         |                                                                             |                                              |                                                                                                                                                                                                                                          |
|----------|--------------------------------------------------------------|----------------------------------------------------------------------------------------------------------------------------|---------------------------------------------------------|-----------------------------------------------------------------------------|----------------------------------------------|------------------------------------------------------------------------------------------------------------------------------------------------------------------------------------------------------------------------------------------|
|          |                                                              |                                                                                                                            |                                                         |                                                                             | significant downregulation after Cu exposure |                                                                                                                                                                                                                                          |
| Molluscs | <i>Lymnaea stagnalis</i> and <i>Dreissena polymorpha</i>     | MT response to metal exposure in molluscs that have contrasting feeding behavior and therefore metal accumulation profiles | Determination of cysteine residues                      | digestive gland                                                             | Al, Cd                                       | MT is up regulated in molluscan responses to cadmium, but not aluminum, exposure<br>Desouky, 2012                                                                                                                                        |
|          | <i>Crassostrea gigas</i> and <i>Mytilus edulis</i>           | Influence of metal exposure on metallothionein synthesis and lipid peroxidation in two bivalve mollusks:                   | pulse polarography                                      | gills, digestive gland                                                      | Ag, Cd, Cu, Hg, Zn                           | Metal exposure decreased the total protein concentrations in the gills of oysters and the digestive gland of mussels and an increase on metallothionein concentrations in the gills of both mollusks were observed.<br>Géret et al. 2002 |
|          | <i>Haliotis discus hannai</i>                                | Transcriptional responses of metallothionein gene to different stress factors                                              | qRT PCR                                                 | hemocyte muscle, gut tentacle, heart testis, eye hepatopancreas gill, ovary | Cd, Co, Cr,Cu, Mn,Ni, Zn                     | MT gene is heavy-metal inducible, and modulated by immune stimulation, hypoxia, heat shock, and xenobiotics exposure<br>Lee & Nam, 2016                                                                                                  |
|          | <i>Crassostrea iredalei</i> and <i>Crassostrea glomerata</i> | Relationship between levels of lead, cadmium and mercury, and metallothionein protein abundance                            | Polyclonal secondary antibody-based immunoprecipitation | gills, stomach                                                              | Pb, Cd, and Hg                               | MT levels were significantly associated with heavy metal levels<br>Hertiga et al. 2018                                                                                                                                                   |
|          | <i>Corbicula fluminea</i>                                    | Influence of hydrodynamic conditions on                                                                                    | The MT concentrations were calculated                   | visceral mass, foot, gill and mantle                                        | Cd                                           | The MT concentrations were barely affected by hydrodynamic conditions and were significantly<br>Geng et al. 2015                                                                                                                         |

|                                  |                                                                |                                                                                          |                                                     |    |                                                                                                                                                                                           |                            |
|----------------------------------|----------------------------------------------------------------|------------------------------------------------------------------------------------------|-----------------------------------------------------|----|-------------------------------------------------------------------------------------------------------------------------------------------------------------------------------------------|----------------------------|
|                                  | metallothionein response                                       | using a molar ratio of 7 for Cd/MT. The Cd bound to the MT was measured using an ICP-MS. |                                                     |    | linearly related to the Cd concentration in the visceral mass                                                                                                                             |                            |
| <i>Anodonta woodiana</i>         | Cadmium accumulation and MT biosynthesis                       | Indirect measurement by Cd estimation through atomic absorption spectrophotometry        | gills, mantle, foot, visceral mass, digestive gland | Cd | MT levels in the gills and mantle of the mussels increased significantly, which were in positive correlation with Cd accumulation                                                         | Li et al. 2015             |
| <i>Crassostrea angulata</i>      | Relationship between Cd accumulation, oxidative stress and MT  | Cytosolic fraction using differential pulse polarography                                 | gills, digestive gland                              | Cd | Cd accumulation induces MT-like protein but suppresses GSH levels to decrease and inhibits antioxidant enzymes.                                                                           | Macías-Mayorga et al. 2015 |
| <i>Crassostrea hongkongensis</i> | MT protein expression in response to Cd stress                 | Polyclonal antibody based immune-precipitation                                           | gill, mantle, digestive gland                       | Cd | A striking induction of MT protein expression under Cd stress was observed                                                                                                                | Xu et al. 2015             |
| <i>Biomphalaria glabrata</i>     | MT response patterns due to Cd exposure and temperature stress | qRT PCR                                                                                  | midgut gland                                        | Cd | <i>MT</i> gene in the midgut gland of <i>Biomphalaria glabrata</i> did not show transcriptional upregulation upon exposure to Cd, in spite of the strong metal accumulation in this organ | Niederwanger et al. 2017   |

|             |                                                                  |                                                                                           |                                                                           |                                                            |           |                                                                                                                                                                                       |                            |
|-------------|------------------------------------------------------------------|-------------------------------------------------------------------------------------------|---------------------------------------------------------------------------|------------------------------------------------------------|-----------|---------------------------------------------------------------------------------------------------------------------------------------------------------------------------------------|----------------------------|
| Crustaceans | <i>Mytilus galloprovincialis</i> and <i>Ruditapes decussatus</i> | Comparative evaluation of MT induction in response to Cd in two bivalves                  | Differential pulse polarography using rabbit liver MT as working standard | gills                                                      | Cd        | MT concentration detected in the gills of <i>M. galloprovincialis</i> increase fourfold while for the clam <i>R. decussatus</i> MT concentrations increased twofold in response to Cd | Bebianno and Serafim, 1998 |
|             | <i>Mytilus coruscus</i>                                          | Identification, functional domain study and tissue based, time-dependent expression of MT | qRT PCR                                                                   | hemocyte, gill, hepatopancreas, gonad, adductor and mantle | Cu, Pb    | The time-dependent expression pattern of MT was observed in each treated group, but the highest expression appeared at different times for various concentrations of Cu and Pb.       | Ge et al. 2020             |
|             | <i>Litopenaeus vannamei</i>                                      | Aquafeed as a route of Hg toxicity of shrimp                                              | qRT PCR                                                                   | muscle, hepatopancreas and exoskeleton                     | Hg        | MT showed no variation in expression indicating that the contact with feed containing the observed Hg concentrations were not sufficient to activate gene transcription               | Soares et al. 2011         |
|             | <i>Litopenaeus vannamei</i>                                      | MT-like proteins and energy reserve levels after heavy metal exposure                     | Polarographic determination in heat-denaturated cytosol                   | hepatopancreas, muscle                                     | Ni and Pb | No influence of Ni and/or Pb in MT induction in muscle                                                                                                                                | Nunez-Nogueira et al. 2010 |
|             | <i>Exopalaemon carinicauda</i>                                   | MT-1 gene response to heavy metal ions challenge                                          | qRT PCR                                                                   | hepatopancreas                                             | Cd, Cu    | <i>EcMT-1</i> was up-regulated after challenge with Cd or Cu exposure                                                                                                                 | Liu et al. 2022            |

|                                   |                                                                                                                                                          |                                                                                     |                                    |        |                                                                                                                                                                                                    |                     |
|-----------------------------------|----------------------------------------------------------------------------------------------------------------------------------------------------------|-------------------------------------------------------------------------------------|------------------------------------|--------|----------------------------------------------------------------------------------------------------------------------------------------------------------------------------------------------------|---------------------|
| <i>Sinopotamon henanense</i>      | MT response after exclusive and combined metal exposure                                                                                                  | Indirect estimation through Cd determination by atomic absorption spectrophotometer | gills and hepatopancreas           | Cd, Zn | MT contents increased after single Cd exposure and also showed a time- and dose-dependence, in a tissue-specific way. Zn showed a limited ability of MT induction both in gills and hepatopancreas | Li et al. 2013      |
| <i>Litopenaeus vannamei</i>       | Accumulation and depuration of Cd and its effect on the expressions of MT                                                                                | real-time PCR                                                                       | gills, hepatopancreas and muscles  | Cd     | MT expression in hepatopancreas increased in a time-dependent manner after Cd exposure                                                                                                             | Li et al. 2021      |
| <i>Sinopotamon henanense</i>      | Bioaccumulation, morphological changes, and induction of MT expression in the digestive system of crab <i>Sinopotamon henanense</i> after exposure to Cd | real-time PCR                                                                       | Hepatopancreas and digestive tract | Cd     | The expression of MT mRNA increased with increasing Cd concentration, and MT mRNA level in acute exposure groups was significantly lower when compared to the subchronic exposure groups.          | Wu et al. 2015      |
| <i>Macrobrachium malcolmsonni</i> | Glutathione S-transferase and metallothionein levels in prawn exposed to heavy metal                                                                     | <sup>203</sup> Hg radio assay                                                       | Hepatopancreas , gills             | Hg     | The induction of MT level was higher compared with control                                                                                                                                         | Yaamuna et al. 2012 |

---
